# Supplementary material for: Chemical evolution of an autonomous DNAzyme with allele-specific gene silencing activity
Source: PubMed Central journal article supplement (PMC10140269; doi:10.1038/s41467-023-38100-9), 2023-04-27
Supplement: 41467_2023_38100_MOESM1_ESM.pdf [file 41467_2023_38100_MOESM1_ESM.pdf]

# Supplementary Information

## Chemical Evolution of an Autonomous DNAzyme with Allele-Specific Gene Silencing Activity

Kim Nguyen<sup>1†</sup>, Turnee N. Malik<sup>1†</sup>, and John C. Chaput<sup>1-4\*</sup>

<sup>1</sup>Department of Pharmaceutical Sciences, University of California, Irvine, CA 92697-3958 USA

<sup>2</sup>Department of Chemistry, University of California, Irvine, CA 92697-3958 USA

<sup>3</sup>Department of Molecular Biology and Biochemistry, University of California, CA 92697-3958 USA

<sup>4</sup>Department of Chemical and Biomolecular Engineering, University of California, Irvine, CA 92697-3958 USA

## Table of contents

### Supplementary Figures

- Figure S1. Structural views of DNAzyme 10-23.
- Figure S2. Mechanism of DNAzyme-mediated RNA cleavage
- Figure S3. Structure activity relationship analysis of position 14 in the catalytic loop of DNAzyme 10-23
- Figure S4. Structure activity relationship analysis of 10-23 variants prepared with modified binding arms, G14 modification and a phosphodiester linkage at position 0-1 of the catalytic loop
- Figure S5. 2'-Methoxy walk of the catalytic loop for double modifications that enhance activity
- Figure S6. Structure-activity analysis of positions 7, 8, and 14 in the catalytic loop with 2'-methoxy residues
- Figure S7. Structure-activity analysis of positions 7, 8, and 14 in the catalytic loop with 2'-methoxyethoxy residues
- Figure S8. Structure-activity analysis of positions 7, 8, and 14 with a phosphorothioate linkage at position 0-1 in the catalytic loop.
- Figure S9. Chemical optimization of 10-23 variant 13
- Figure S10. Chemical optimization of 10-23 variant 42 measured at 100:1 (S:E)
- Figure S11. Summary of 10-23 Designs Evaluated in Kinetic Cleavage Assays
- Figure S12. Multiple turnover kinetic analysis of 10-23 variants measured at 10:1 substrate to enzyme concentration
- Figure S13. Transferability of Dz 46 chemistry to other targets
- Figure S14. Multiple turnover kinetic analysis comparing variant 46 to known methoxy derivatives at 100:1 substrate to enzyme concentration
- Figure S15. Magnesium dependency of engineered 10-23 variants measured at 100:1 substrate to enzyme concentration
- Figure S16. Activity of Dz 46 under reduced concentrations of magnesium
- Figure S17. Nearest neighbor analysis of unmodified Dz 1
- Figure S18. Analysis of Dz 46 cleavage motif preferences in long RNA substrates
- Figure S19. Analysis of Dz 1 cleavage preferences in long RNA substrates
- Figure S20. Evaluation of allele-specific cleavage by Dz 46 under multiple turnover conditions in the presence of RNase H
- Figure S21. Absolute values observed for allele-specific knock-down

### Supplementary Tables

- Table S1. G12V KRAS targeting DNAzymes used in chemical evolution screening
- Table S2. Control oligos (active, inactive, and non-binding DNAzymes, ASO)
- Table S3. DNAzymes used to define the preferred cleavage motif
- Table S4. RNA substrates
- Table S5. *HsRNase H1* level in human cell lines measured by ELISA

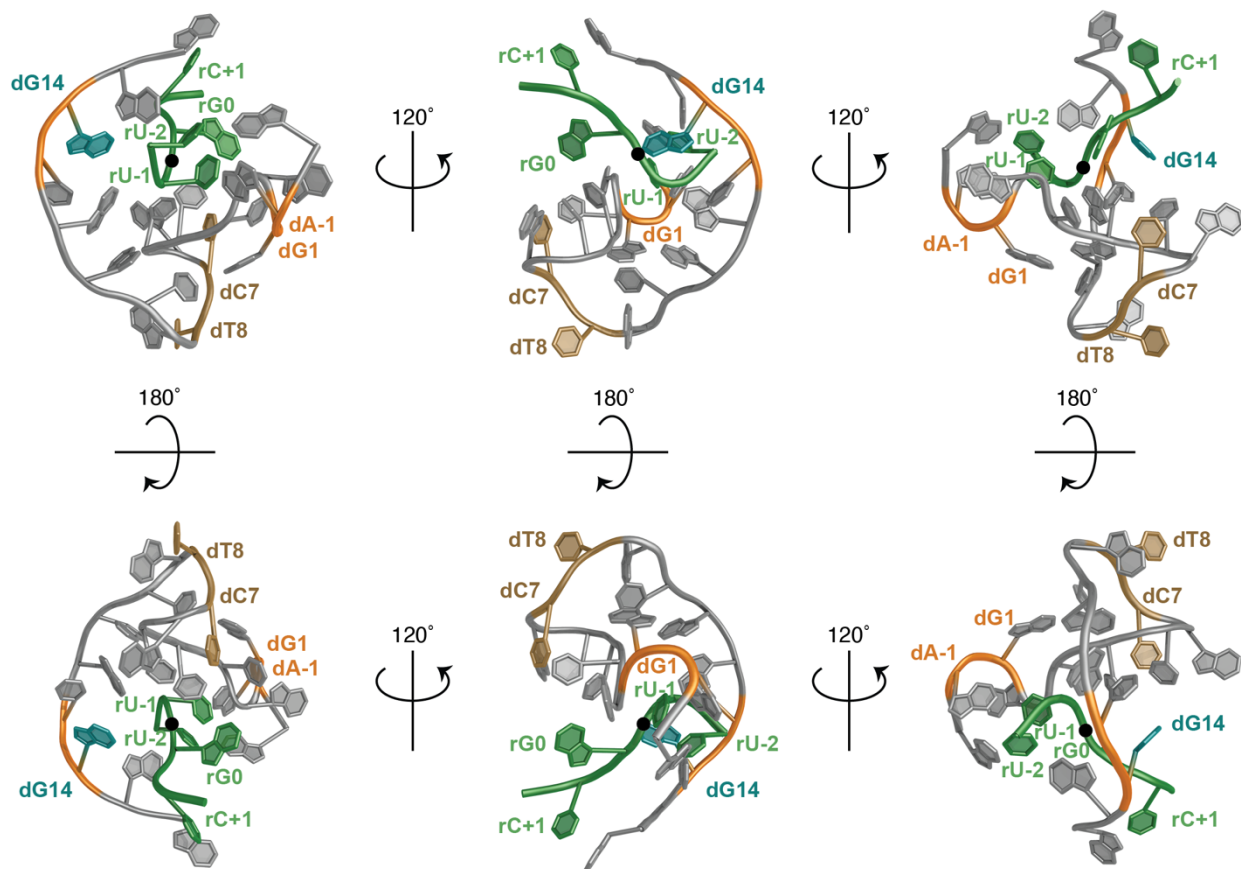

**Supplementary Figure 1. Structural views of DNAzyme 10-23.** Cartoon representation of an NMR-averaged precatalytic structure of 10-23 bound to an RNA substrate (green) encoding a prion protein (PDB: 7PDU). Structural views observed at 120° and 240° horizontal rotations and vertical rotations of 180°.

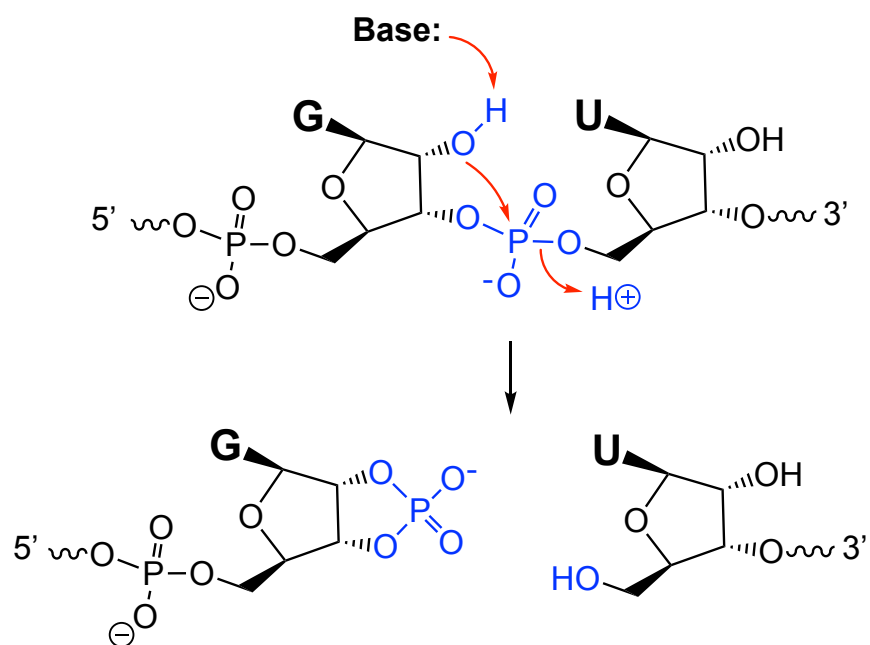

**Supplementary Figure 2. Mechanism of DNAzyme-mediated RNA cleavage.** Site-specific RNA cleavage occurs by deprotonation of the 2' hydroxyl group of the scissile residue with simultaneous protonation of the 5' hydroxyl group of the cleaved bond. In-line attack of the resulting 2' oxyanion on the adjacent phosphate results in the formation of an upstream cleavage product carrying cyclic phosphate and downstream cleavage product with a hydroxyl group.

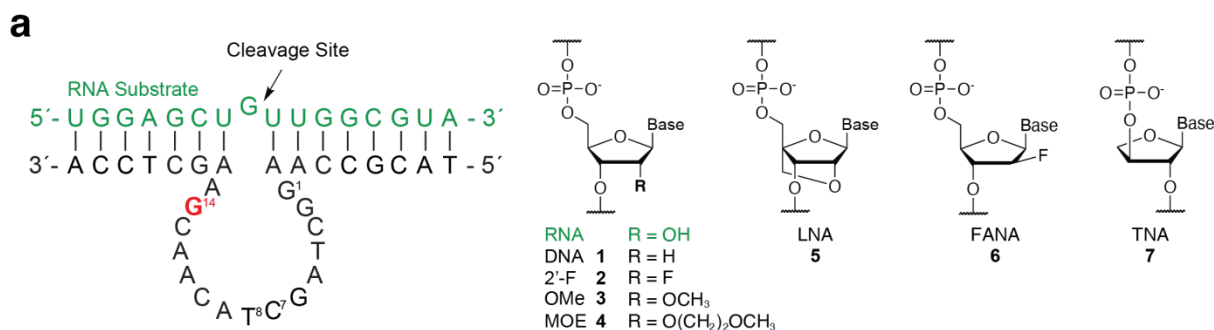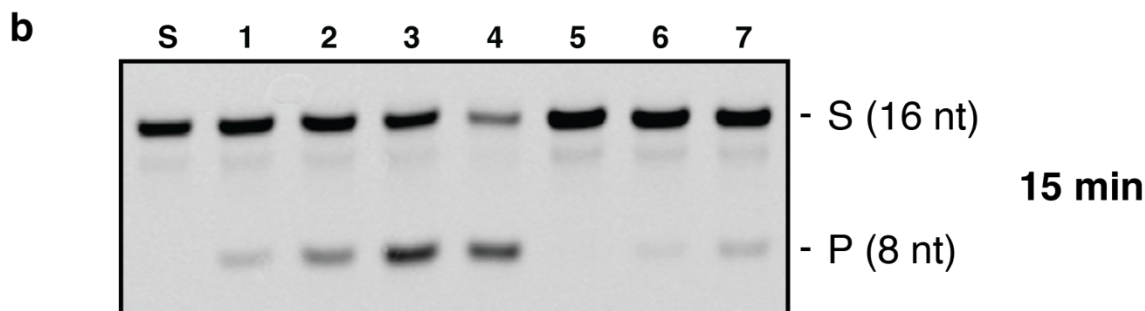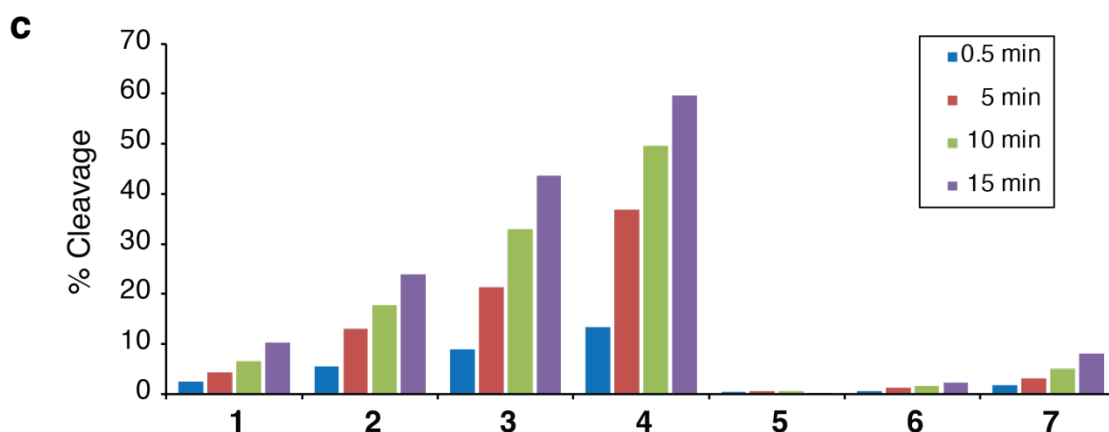

**Supplementary Figure 3. Structure activity relationship analysis of position 14 in the catalytic loop of DNAzyme 10-23.** **a.** Nucleic acid sequence of DNAzyme 10-23 targeting a segment of KRAS G12V mRNA and chemical structures of sugar modified analogs. Abbreviations of nucleotide analogs: 2'-F (2'-deoxy-2'-fluororibonucleic acid), OMe (2'-deoxy-2'-methoxyribonucleic acid), MOE (2'-deoxy-2'-methoxyethoxyribonucleic acid), LNA (locked nucleic acid), FANA (2'-fluoroarabinonucleic acid), and TNA (threose nucleic acid). **b-c.** Representative gel and bar graph showing the cleavage activity of each analog (n = 1). All reactions were performed in simulated physiological buffer containing 1 mM MgCl<sub>2</sub>, 50 mM Tris (pH 7.5), 10 mM NaCl, and 140 mM KCl at 37°C with 500 nM substrate and 50 nM enzyme (10:1, S:E). S: 5'-Cy5 labeled full-length substrate, P: 5'-Cy5 labeled cleavage product. Molecular weight markers indicated to the right of the gel.

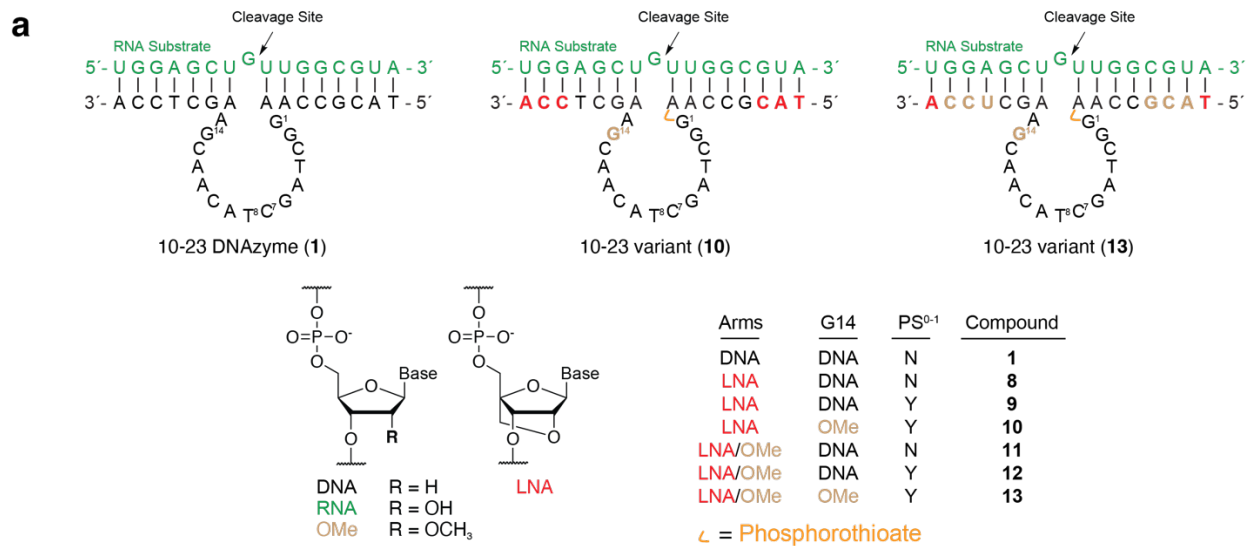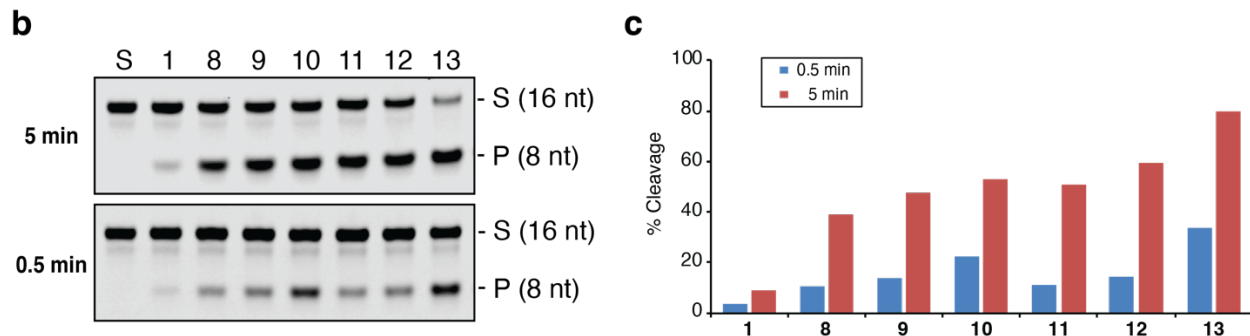

**Supplementary Figure 4. Structure activity relationship analysis of 10-23 variants prepared with modified binding arms, G14 modification and a phosphodiester linkage at position 0-1 of the catalytic loop.** **a.** Sequences of DNAzyme 10-23 (wild-type and engineered variants) targeting a segment of KRAS G12V mRNA and chemical structures of sugar modified analogs. Abbreviations of nucleotide analogs: LNA (locked nucleic acid), OMe (2'-deoxy-2'-methoxyribonucleic acid), and phosphorothioate. **b-c.** Representative gels and bar graph showing the cleavage activity of each analog (n = 1). All reactions were performed in simulated physiological buffer containing 1 mM MgCl<sub>2</sub>, 50 mM Tris (pH 7.5), 10 mM NaCl, and 140 mM KCl at 37°C with 500 nM substrate and 50 nM enzyme (10:1, S:E). S: 5'-Cy5 labeled full-length substrate, P: 5'-Cy5 labeled cleavage product. Molecular weight markers indicated to the right of the gel.

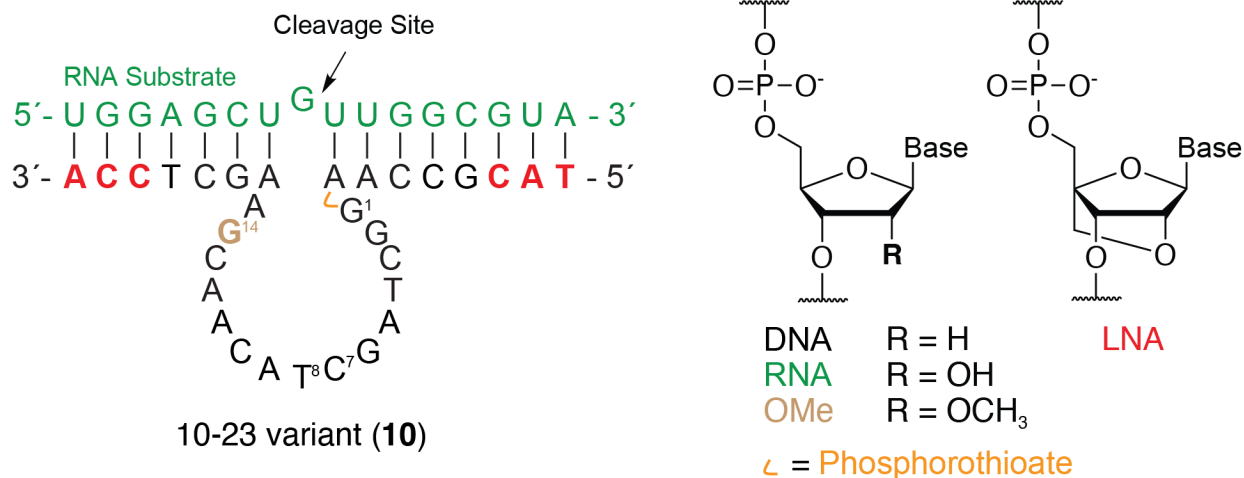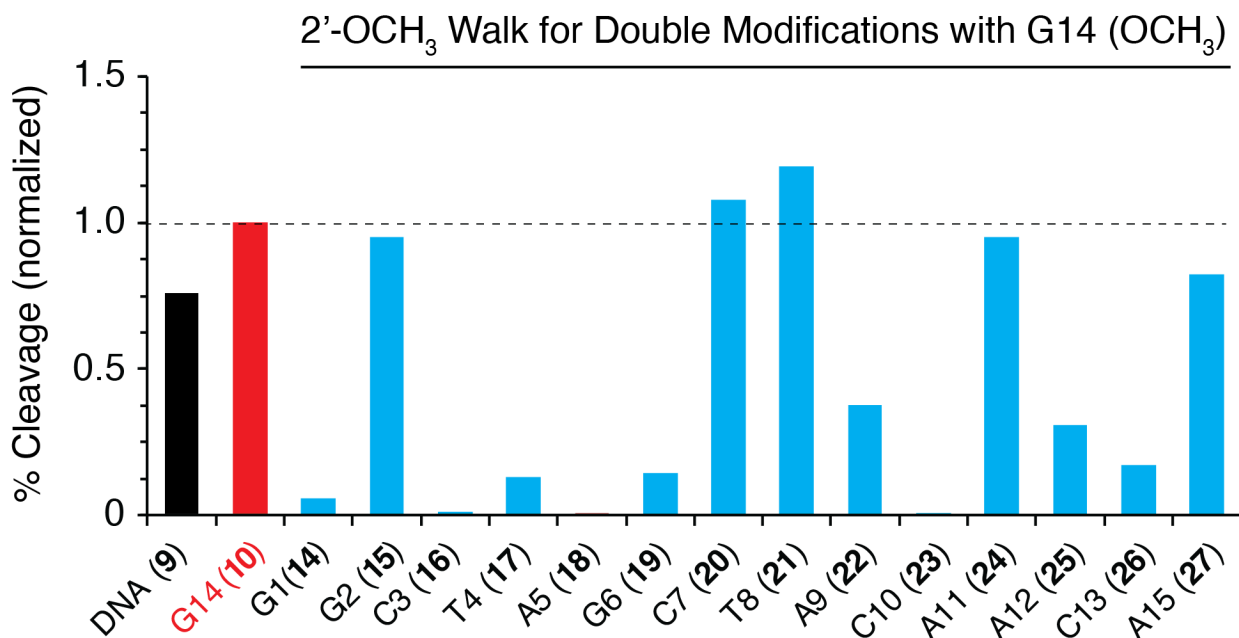

**Supplementary Figure 5. 2'-Methoxy walk of the catalytic loop for double modifications that enhance activity.** Sequence of DNAzyme 10-23 (variant 10) targeting a segment of KRAS G12V mRNA and chemical structures of sugar modified analogs. Abbreviations of nucleotide analogs: LNA (locked nucleic acid), OMe (2'-deoxy-2'-methoxyribonucleic acid), and phosphorothioate. Bar graph denotes the cleavage activity of each 10-23 variant after a 5 minute incubation at 37°C (n = 1). Colors scheme: 10-23 variant 9 (black), 10-23 variant 10 (red), and 10-23 variant 10 modified with a second OMe residue in the catalytic loop (blue). All reactions were performed in simulated physiological buffer containing 1 mM MgCl<sub>2</sub>, 50 mM Tris (pH 7.5), 10 mM NaCl, and 140 mM KCl with 500 nM substrate and 50 nM enzyme (10:1, S:E). S: 5'-Cy5 labeled full-length substrate, P: 5'-Cy5 labeled cleavage product.

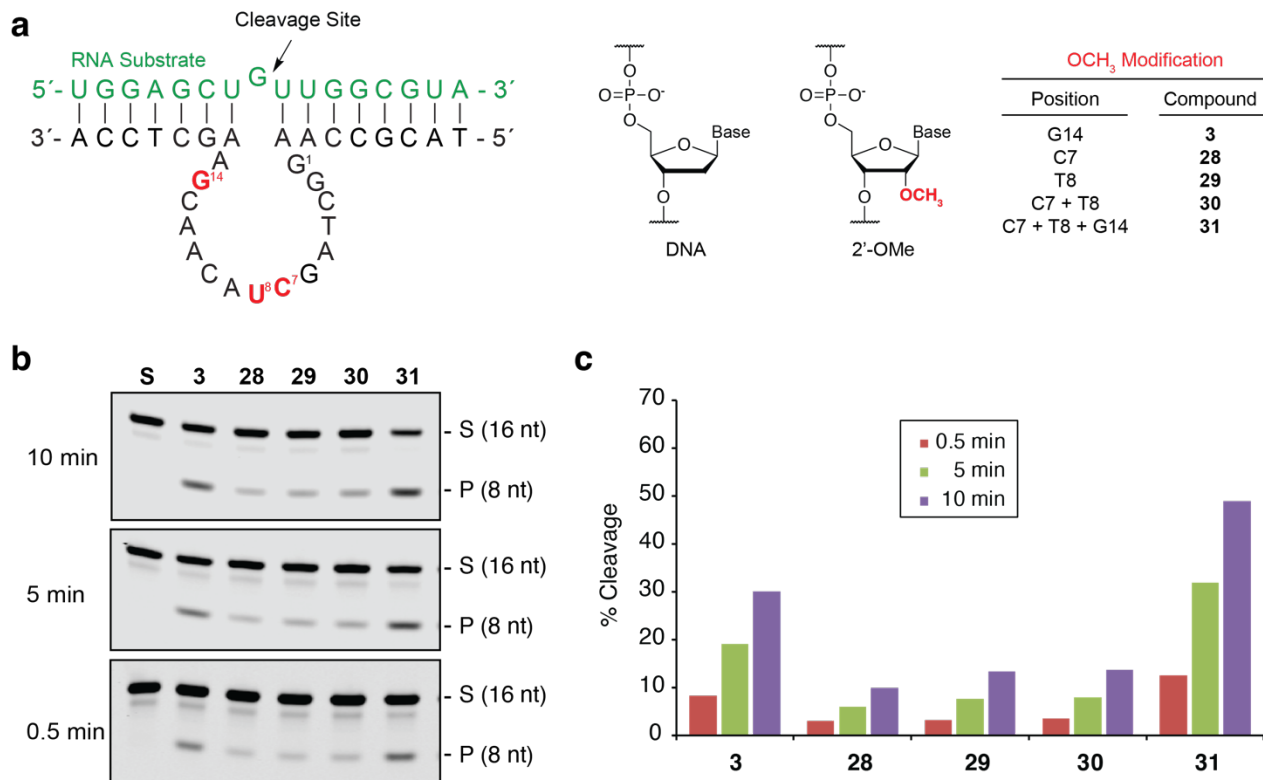

**Supplementary Figure 6. Structure-activity analysis of positions 7, 8, and 14 in the catalytic loop with 2'-methoxy residues.** **a.** Sequence of DNAzyme 10-23 targeting a KRAS G12V mRNA segment and chemical structures of sugar modified analogs. Abbreviation: OMe (2'-deoxy-2'-methoxyribonucleic acid). **b-c.** Representative gels and bar graph showing the cleavage activity of each analog ( $n = 1$ ). All reactions were performed in simulated physiological buffer containing 1 mM MgCl<sub>2</sub>, 50 mM Tris (pH 7.5), 10 mM NaCl, and 140 mM KCl at 37°C with 500 nM substrate and 50 nM enzyme (10:1, S:E). S: 5'-Cy5 labeled full-length substrate, P: 5'-Cy5 labeled cleavage product. Molecular weight markers indicated to the right of the gel.



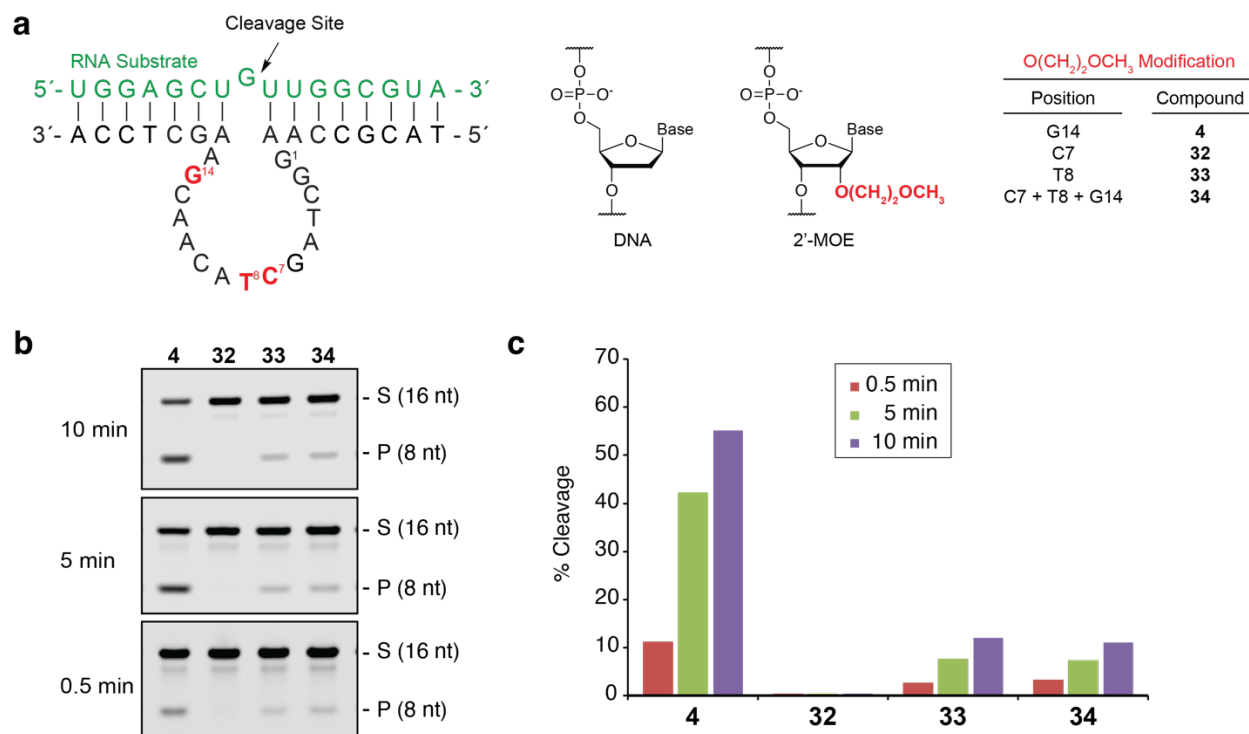

**Supplementary Figure 7. Structure-activity analysis of positions 7, 8, and 14 in the catalytic loop with 2'-methoxyethoxy residues.** **a.** Sequence of DNAzyme 10-23 targeting a KRAS G12V mRNA segment and chemical structures of sugar modified analogs. Abbreviation: MOE (2'-deoxy-2'-methoxyethoxyribonucleic acid). **b-c.** Representative gels and bar graphs showing the cleavage activity of each analog ( $n = 1$ ). All reactions were performed in simulated physiological buffer containing 1 mM MgCl<sub>2</sub>, 50 mM Tris (pH 7.5), 10 mM NaCl, and 140 mM KCl at 37°C with 500 nM substrate and 50 nM enzyme (10:1, S:E). S: 5'-Cy5 labeled full-length substrate, P: 5'-Cy5 labeled cleavage product. Molecular weight markers indicated to the right of the gel.

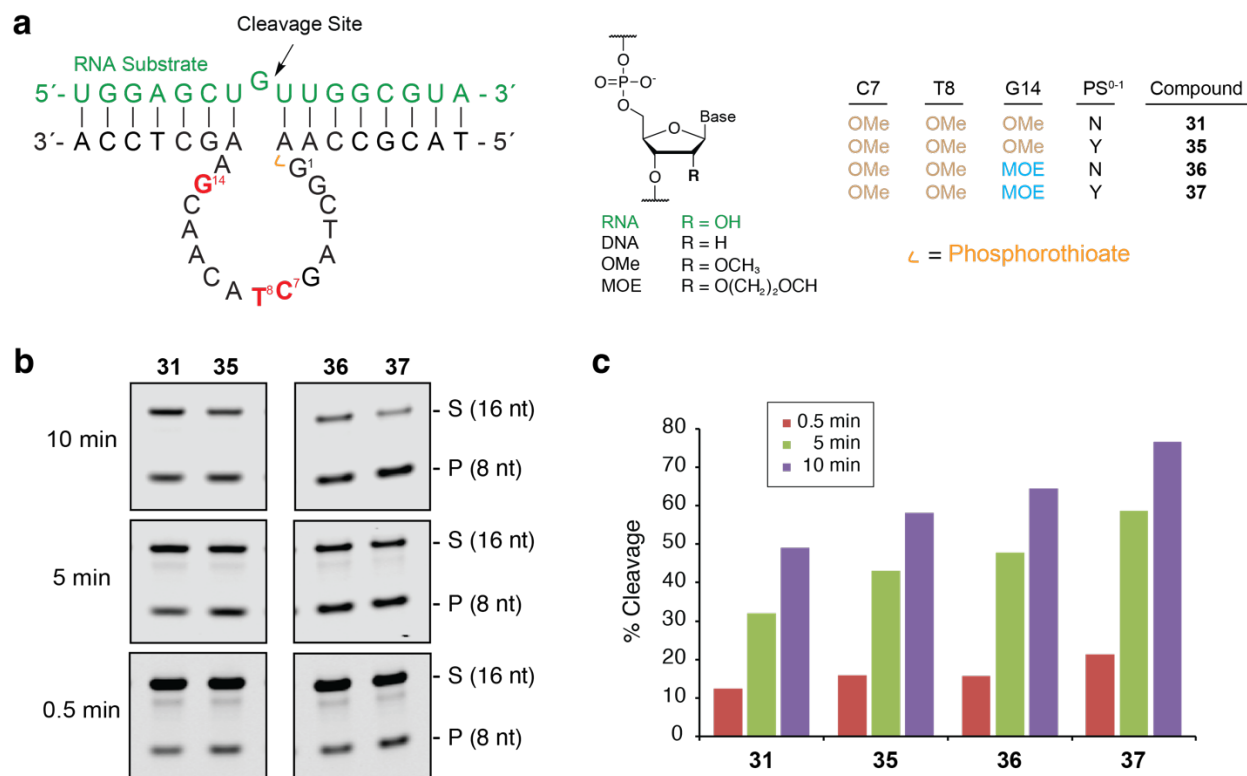

**Supplementary Figure 8. Structure-activity analysis of positions 7, 8, and 14 with a phosphorothioate linkage at position 0-1 in the catalytic loop.** **a.** Sequence of DNAzyme 10-15 targeting a KRAS G12V mRNA segment and chemical structures of sugar modified analogs. Abbreviations of nucleotide analogs: OMe (2'-deoxy-2'-methoxyribonucleic acid), MOE (2'-deoxy-2'-methoxyethoxyribonucleic acid), and phosphorothioate. **b-c.** Representative gels and bar graph showing the cleavage activity of each analog (n = 1). All reactions were performed in simulated physiological buffer containing 1 mM MgCl<sub>2</sub>, 50 mM Tris (pH 7.5), 10 mM NaCl, and 140 mM KCl at 37°C with 500 nM substrate and 50 nM enzyme (10:1, S:E). S: 5'-Cy5 labeled full-length substrate, P: 5'-Cy5 labeled cleavage product. Molecular weight markers indicated to the right of the gel.

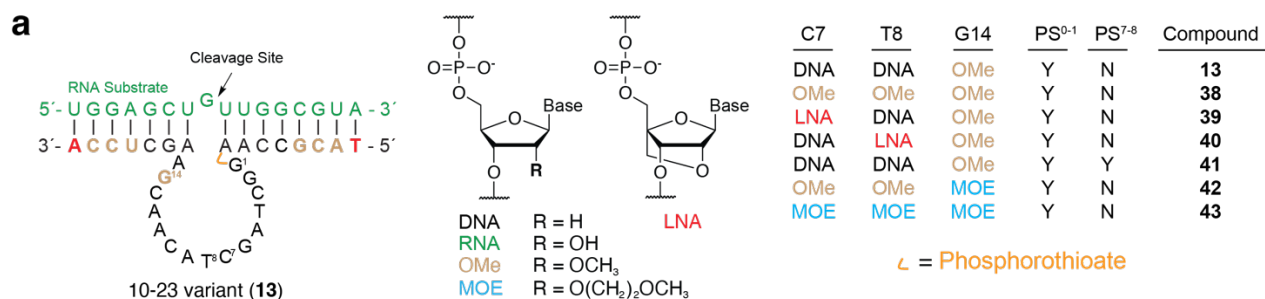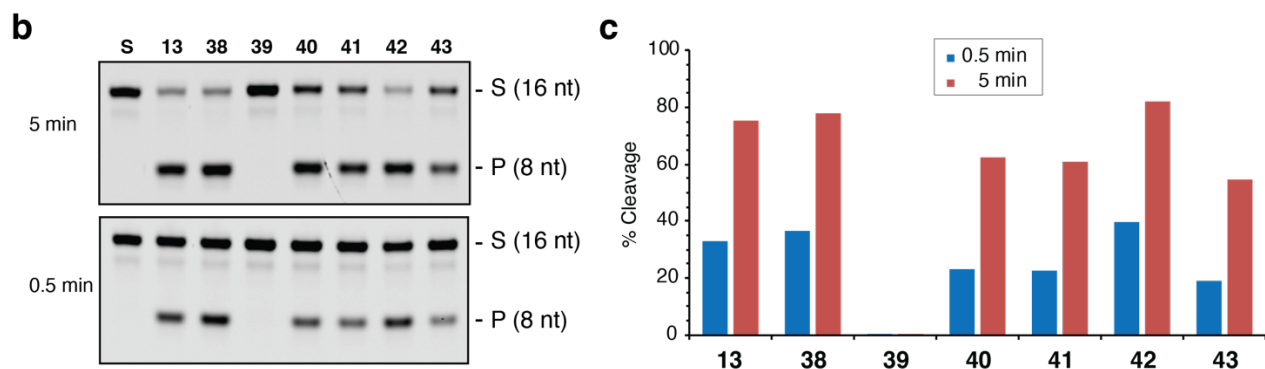

**Supplementary Figure 9. Chemical optimization of 10-23 variant 13.** **a.** Sequence of DNAzyme 10-23 targeting a segment of KRAS G12V mRNA and chemical structures of sugar modified analogs. Abbreviations of nucleotide analogs: OMe (2'-deoxy-2'-methoxyribonucleic acid), MOE (2'-deoxy-2'-methoxyethoxyribonucleic acid), LNA (locked nucleic acid), and phosphorothioate. **b-c.** Representative gel and bar graph showing the cleavage activity of each analog ( $n = 1$ ). All reactions were performed in simulated physiological buffer containing 1 mM  $MgCl_2$ , 50 mM Tris (pH 7.5), 10 mM NaCl, and 140 mM KCl at 37°C with 500 nM substrate and 50 nM enzyme (10:1, S:E). S: 5'-Cy5 labeled full-length substrate, P: 5'-Cy5 labeled cleavage product. Molecular weight markers indicated to the right of the gel.

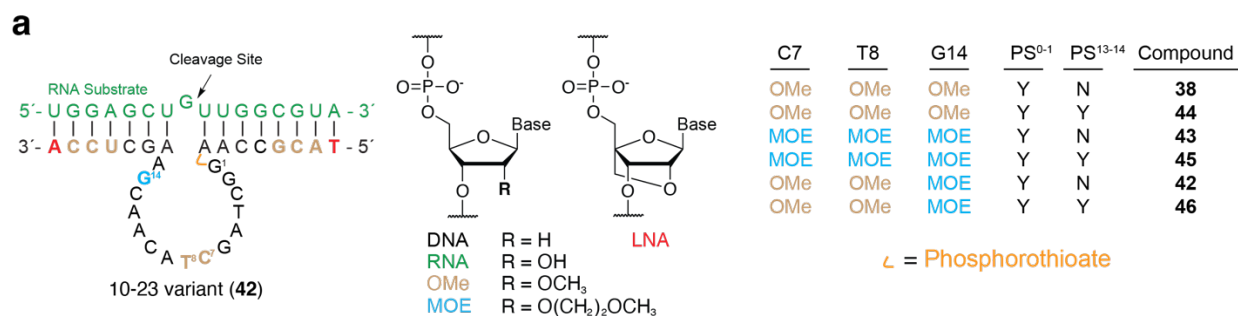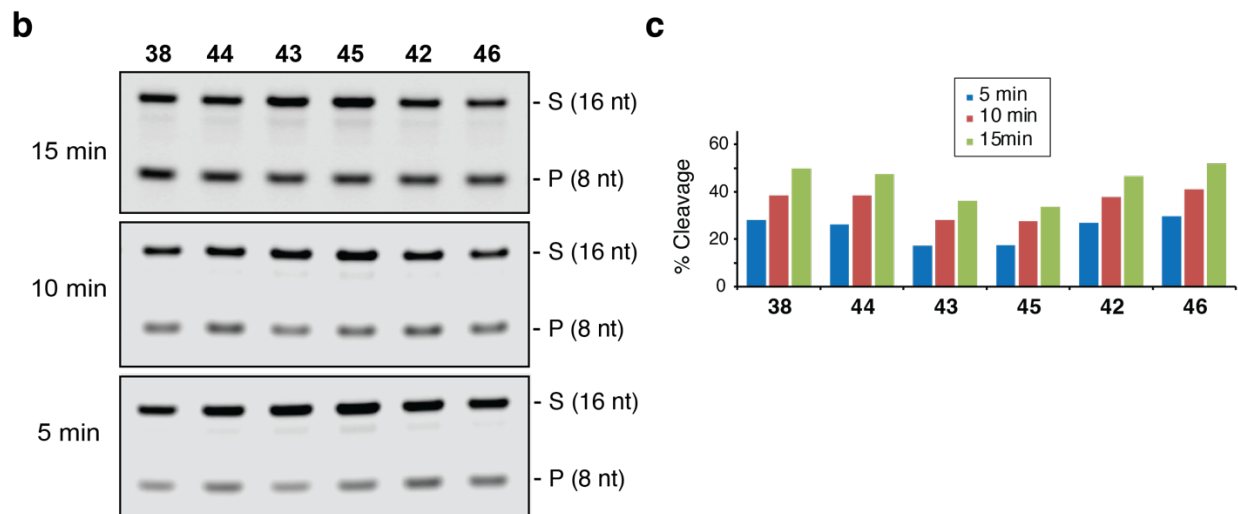

**Supplementary Figure 10. Chemical optimization of 10-23 variant 42 measured at 100:1 (S:E).**

**a.** Sequence of DNAzyme 10-23 targeting a segment of KRAS G12V mRNA and chemical structures of sugar modified analogs. Abbreviations of nucleotide analogs: OMe (2'-deoxy-2'-methoxyribonucleic acid), MOE (2'-deoxy-2'-methoxyethoxyribonucleic acid), LNA (locked nucleic acid), and phosphorothioate. **b-c.** Representative gels and bar graphs showing the cleavage activity of each analog (n = 1). All reactions were performed in simulated physiological buffer containing 1 mM MgCl<sub>2</sub>, 50 mM Tris (pH 7.5), 10 mM NaCl, and 140 mM KCl at 37°C with 1000 nM substrate and 10 nM enzyme (100:1, S:E). S: 5'-Cy5 labeled full-length substrate, P: 5'-Cy5 labeled cleavage product. Molecular weight markers indicated to the right of the gel.

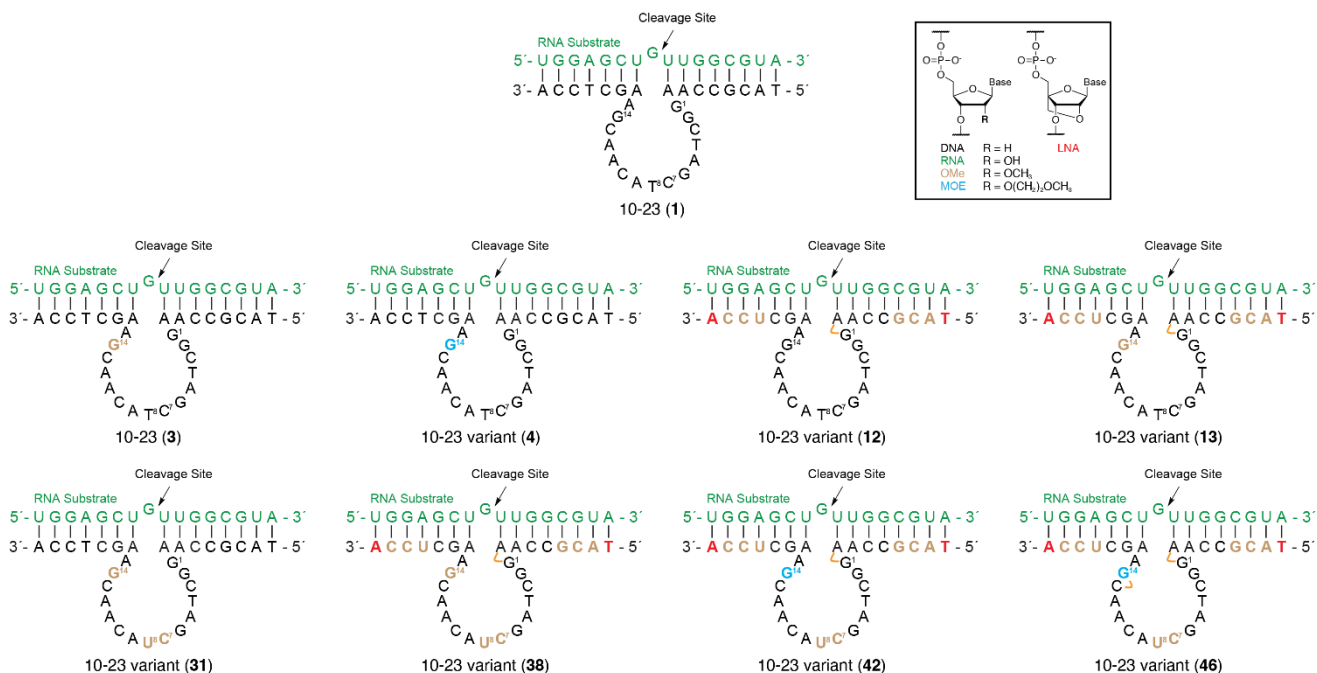

**Supplementary Figure 11. Summary of 10-23 Designs Evaluated in Kinetic Cleavage Assays.**

Sequence of 10-23 DNzyme variants targeting a size-matched segment of KRAS G12V mRNA and chemical structures of sugar modified analogs. Abbreviations of nucleotide analogs: OMe (2'-deoxy-2'-methoxyribonucleic acid), MOE (2'-deoxy-2'-methoxyethoxyribonucleic acid), LNA (locked nucleic acid), and phosphorothioate.

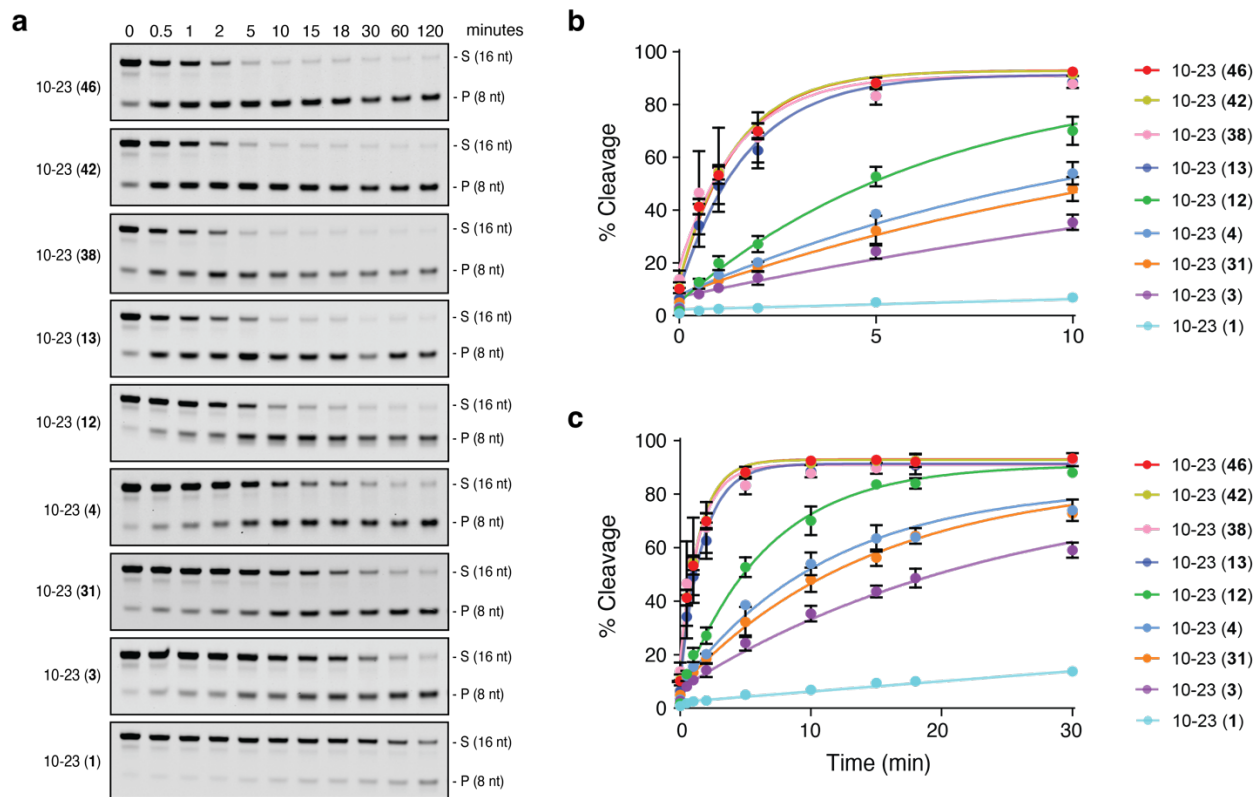

**Supplementary Figure 12. Multiple turnover kinetic analysis of 10-23 variants measured at 10:1 substrate to enzyme concentration.** **a.** Representative denaturing PAGE gels of time-dependent RNA cleavage assays. **b-c.** Kinetic curves plotted after 10 (B) and 30 (C) minutes. All reactions were performed in simulated physiological buffer containing 1 mM MgCl<sub>2</sub>, 50 mM Tris (pH 7.5), 10 mM NaCl, and 140 mM KCl at 37°C with 500 nM substrate and 50 nM enzyme (10:1, S:E). S: 5'-Cy5 labeled full-length substrate, P: 5'-Cy5 labeled cleavage product. Molecular weight markers indicated to the right of the gel. Error bars denote  $\pm$  standard deviation from the mean of 3 independent replicates.

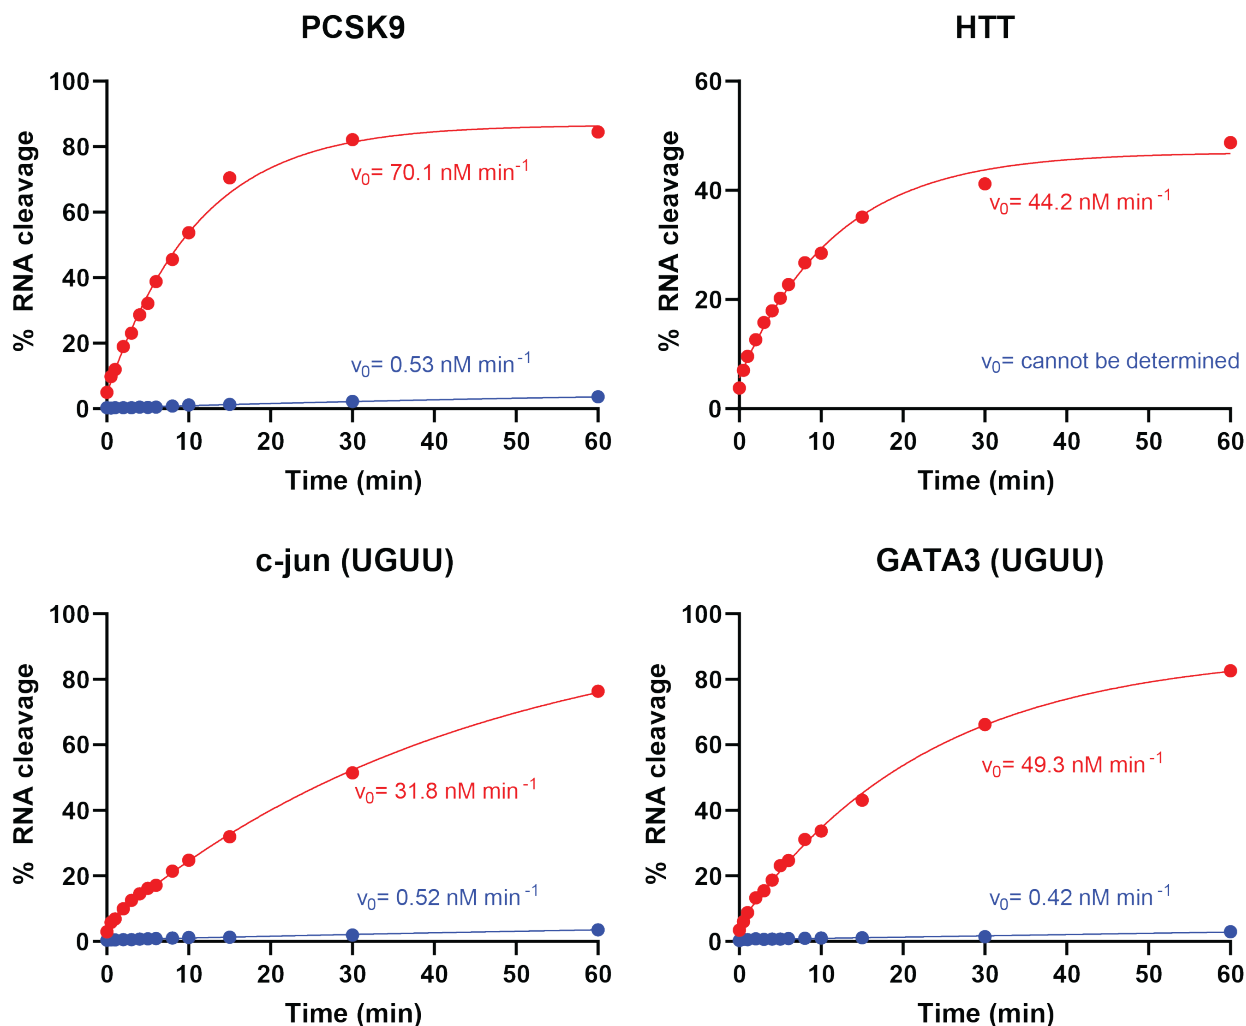

**Supplementary Figure 13. Transferability of Dz 46 chemistry to other targets.** Initial velocities ( $v_0$ ) and kinetic curves measured for Dz 1 (blue) and Dz 46 (red) versions of PCSK9, HTT, GATA3, and c-jun sequences. All four targets utilize the UGUU cleavage motif evaluated in Figure 2c. Reported values represent the mean for 2 independent replicates. The initial velocity for Dz 1 targeting HTT could not be determined due to a lack of cleavage activity observed under the 60 min timeframe. All reactions were performed under simulated physiological conditions in buffer containing 1 mM  $\text{MgCl}_2$ , 50 mM Tris (pH 7.5), 10 mM NaCl, and 140 mM KCl at 37°C with 1000 nM substrate and 10 nM enzyme (100:1, S:E).

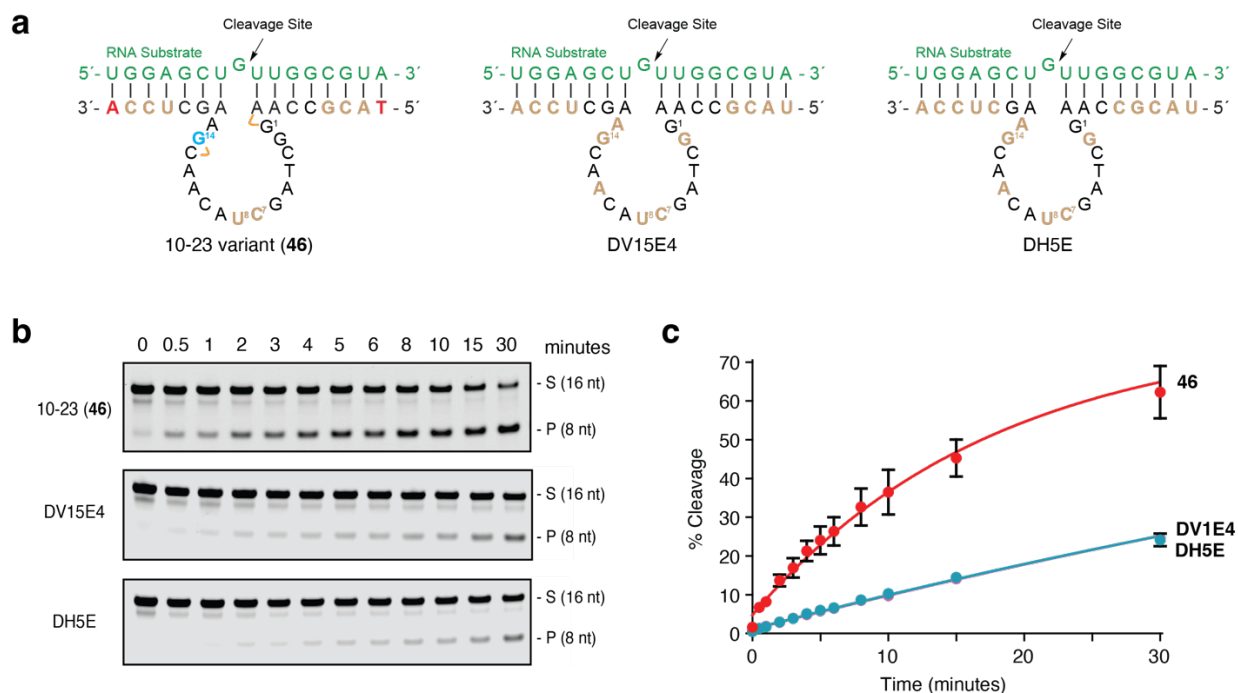

**Supplementary Figure 14. Multiple turnover kinetic analysis comparing variant 46 to known methoxy derivatives at 100:1 substrate to enzyme concentration.** **a.** Nucleic acid sequence of chemically engineered 10-23 variants targeting a segment of KRAS G12V RNA. **b.** Representative denaturing PAGE gels of time-dependent RNA cleavage assays. **c.** Kinetic curves plotted over a reaction time of 30 minutes. All reactions were performed in simulated physiological buffer containing 1 mM MgCl<sub>2</sub>, 50 mM Tris (pH 7.5), 10 mM NaCl, and 140 mM KCl at 37°C with 1000 nM substrate and 10 nM enzyme (100:1, S:E). S: 5'-Cy5 labeled full-length substrate, P: 5'-Cy5 labeled cleavage product. Molecular weight markers indicated to the right of the gel. Error bars denote  $\pm$  standard deviation from the mean of 3 independent replicates.



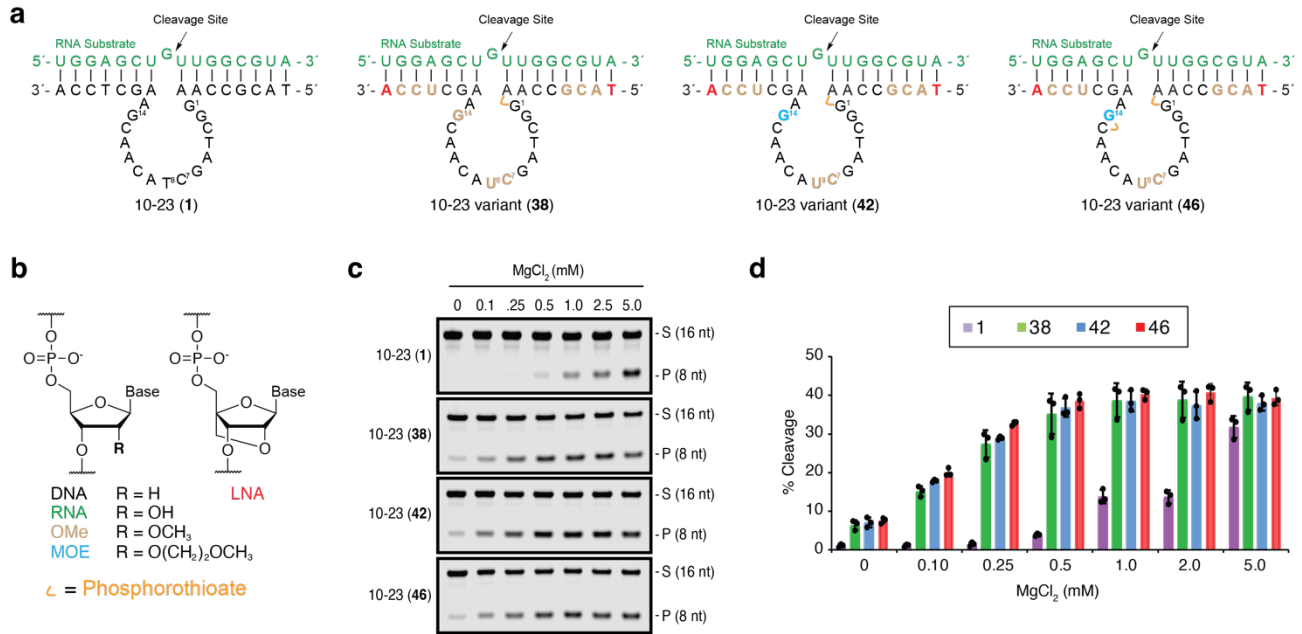

**Supplementary Figure 15. Magnesium dependency of engineered 10-23 variants measured at 100:1 substrate to enzyme concentration.** **a.** Nucleic acid sequence of 10-23 and chemically engineered 10-23 variants targeting a segment of KRAS G12V RNA substrate. **b.** Chemical structures of sugar modified analogs. Abbreviations of nucleotide analogs: OCH<sub>3</sub> (Ome: 2'-deoxy-2'-methoxyribonucleic acid), MOE (2'-deoxy-2'-methoxyethoxyribonucleic acid), LNA (locked nucleic acid), and phosphorothioate. **c-d.** Representative gels and bar graphs showing the cleavage activity of 10-23 variants after 20 minutes of incubation at defined concentrations of MgCl<sub>2</sub>. All reactions were performed in simulated physiological buffer containing 50 mM Tris (pH 7.5), 10 mM NaCl, and 140 mM KCl at 37°C with 1000 nM substrate and 10 nM enzyme (100:1, S:E). S: 5'-Cy5 labeled full-length substrate, P: 5'-Cy5 labeled cleavage product. Molecular weight markers indicated to the right of the gel. Error bars denote  $\pm$  standard deviation from the mean of 3 independent replicates.

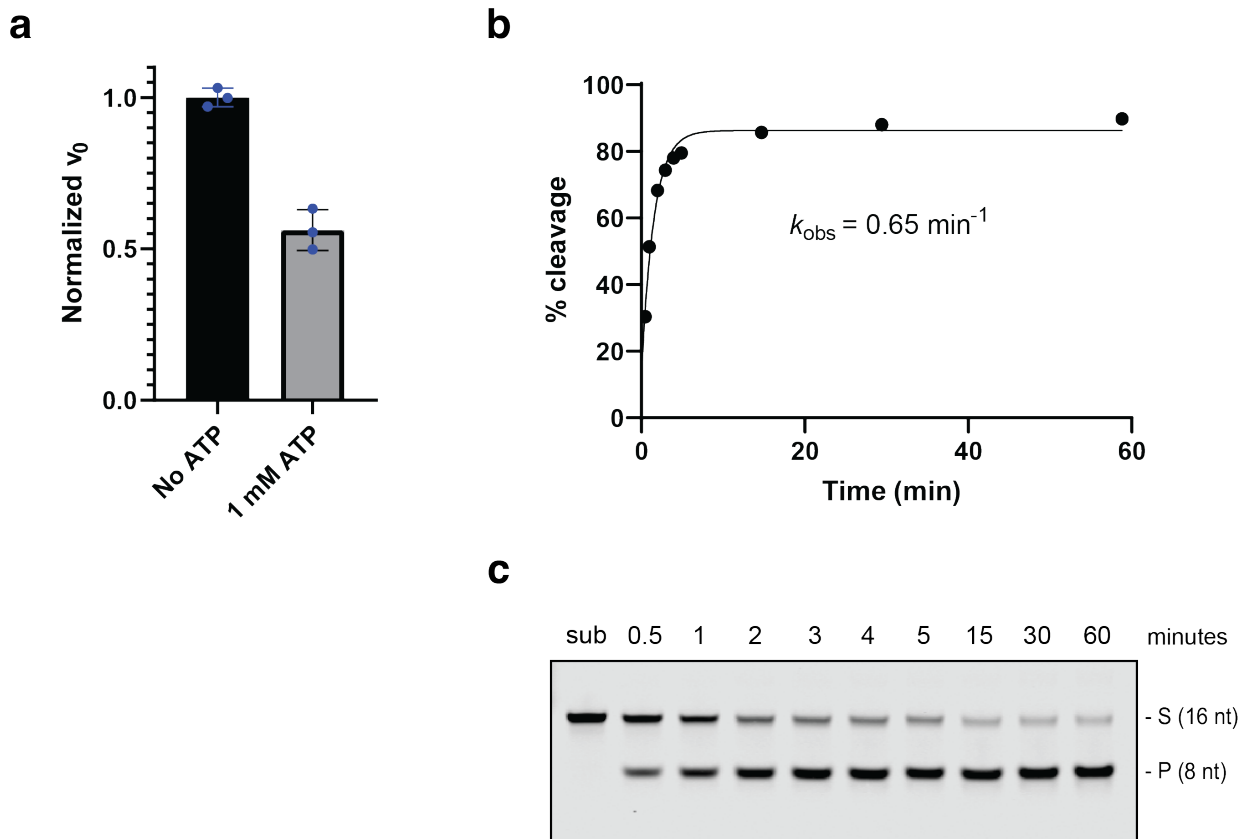

**Supplementary Figure 16. Activity of Dz 46 under reduced concentrations of magnesium. a.** Bar graph showing normalized initial rates for Dz 46 in the presence or absence of 1 mM ATP. Reactions were performed in simulated physiological buffer containing 1 mM  $\text{MgCl}_2$ , 50 mM Tris (pH 7.5), 10 mM NaCl, and 140 mM KCl at 37°C with 1000 nM substrate and 10 nM enzyme (100:1, S:E). Error bars denote  $\pm$  standard deviation of the mean for 3 independent replicates (blue circles). **b-c.** Kinetic curve and representative gel of Dz 46 activity under pseudo first-order reaction conditions. The observed rate constant ( $k_{obs}$ ) is shown. Reported value represents the mean for 2 independent replicates. Reactions were performed in simulated physiological buffer containing 0.25 mM  $\text{MgCl}_2$ , 50 mM Tris (pH 7.5), 10 mM NaCl, and 140 mM KCl at 37°C with 0.5  $\mu\text{M}$  substrate and 2.5  $\mu\text{M}$  enzyme (1:5, S:E). Molecular weight markers indicated to the right of the gel. S: 5'-Cy5 labeled full-length substrate, P: 5'-Cy5 labeled cleavage product.

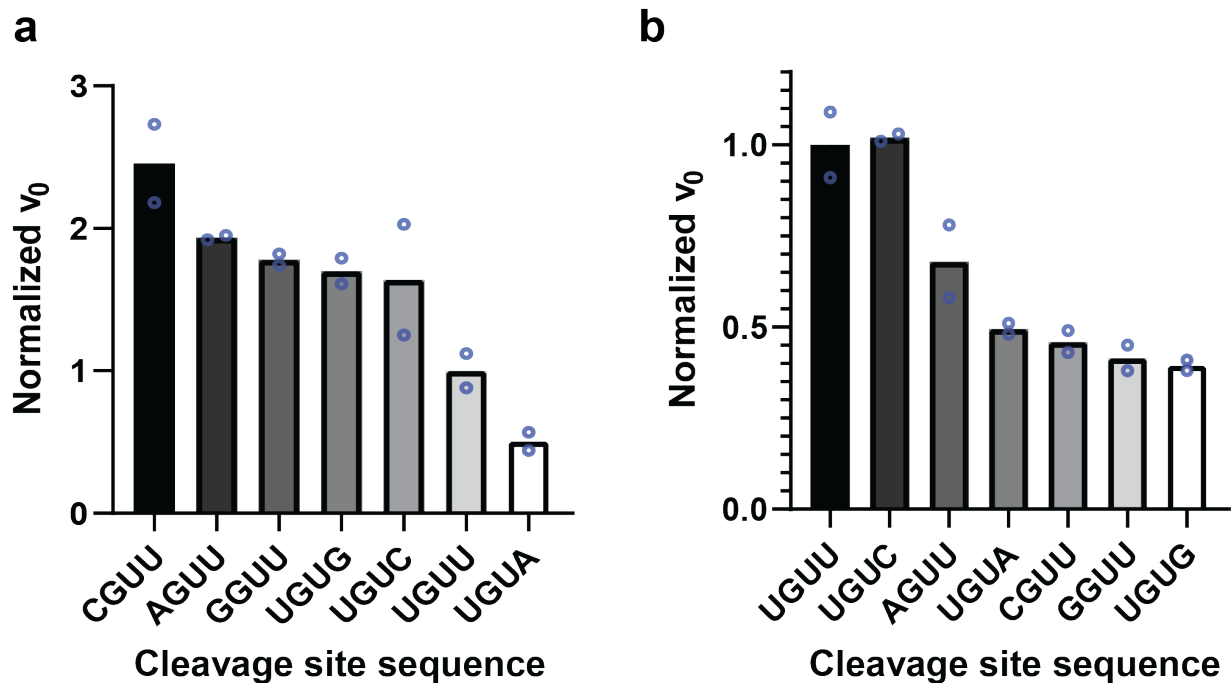

**Supplementary Figure 17. Nearest neighbor analysis of unmodified Dz 1.** **a.** Profiles observed for reactions performed in the presence of 1 mM MgCl<sub>2</sub> and **b.** 5 mM MgCl<sub>2</sub>. Normalized initial rates observed for each DNAzyme-substrate pair using 1000 nM substrate and 10 nM enzyme (100:1, S:E) at 37°C in buffer containing 50 mM Tris (pH 7.5), 10 mM NaCl, 140 mM KCl. Reported values are the mean of 2 independent replicates (blue circles).

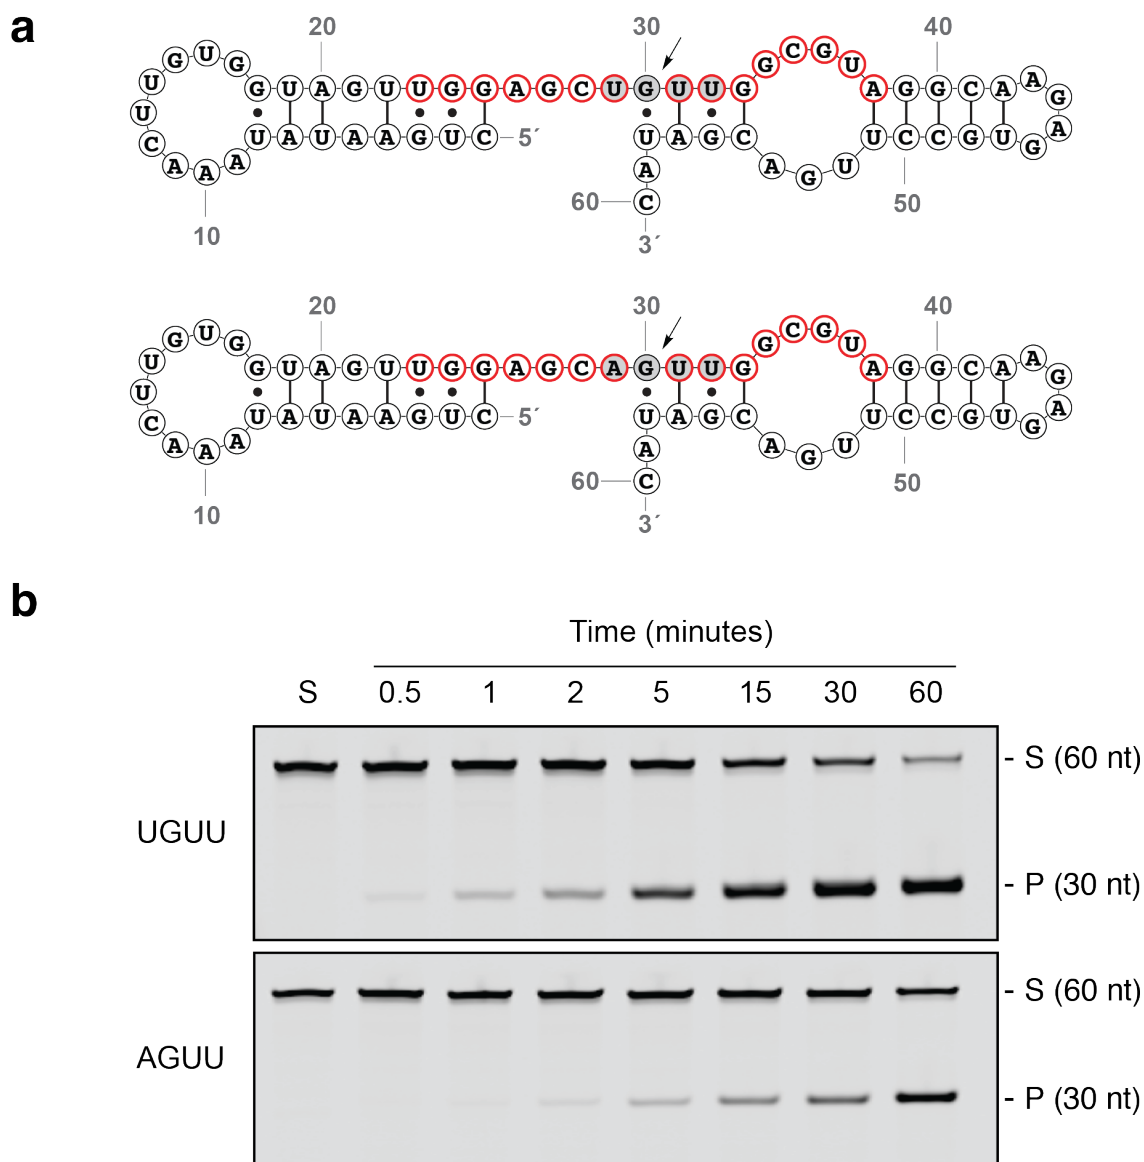

**Supplementary Figure 18. Analysis of Dz 46 cleavage motif preferences in long RNA substrates. a.** Predicted secondary structures of 60 nt. substrates carrying UGUU (top) or AGUU (bottom) cleavage motifs. Nucleotides complementary to the DNAzyme binding sites are outlined in red; cleavage motifs are highlighted in grey; cleavage sites are indicated by arrows. **b.** Representative PAGE gels showing time-dependent cleavage of the substrates shown above. Reactions were performed in simulated physiological buffer containing 1 mM MgCl<sub>2</sub>, 50 mM Tris (pH 7.5), 10 mM NaCl, and 140 mM KCl at 37°C with 500 nM substrate and 50 nM enzyme (10:1, S:E). Molecular weight markers indicated to the right of the gel. S: 5'-Cy5 labeled full-length substrate, P: 5'-Cy5 labeled cleavage product. For each cleavage motif, n = 1.

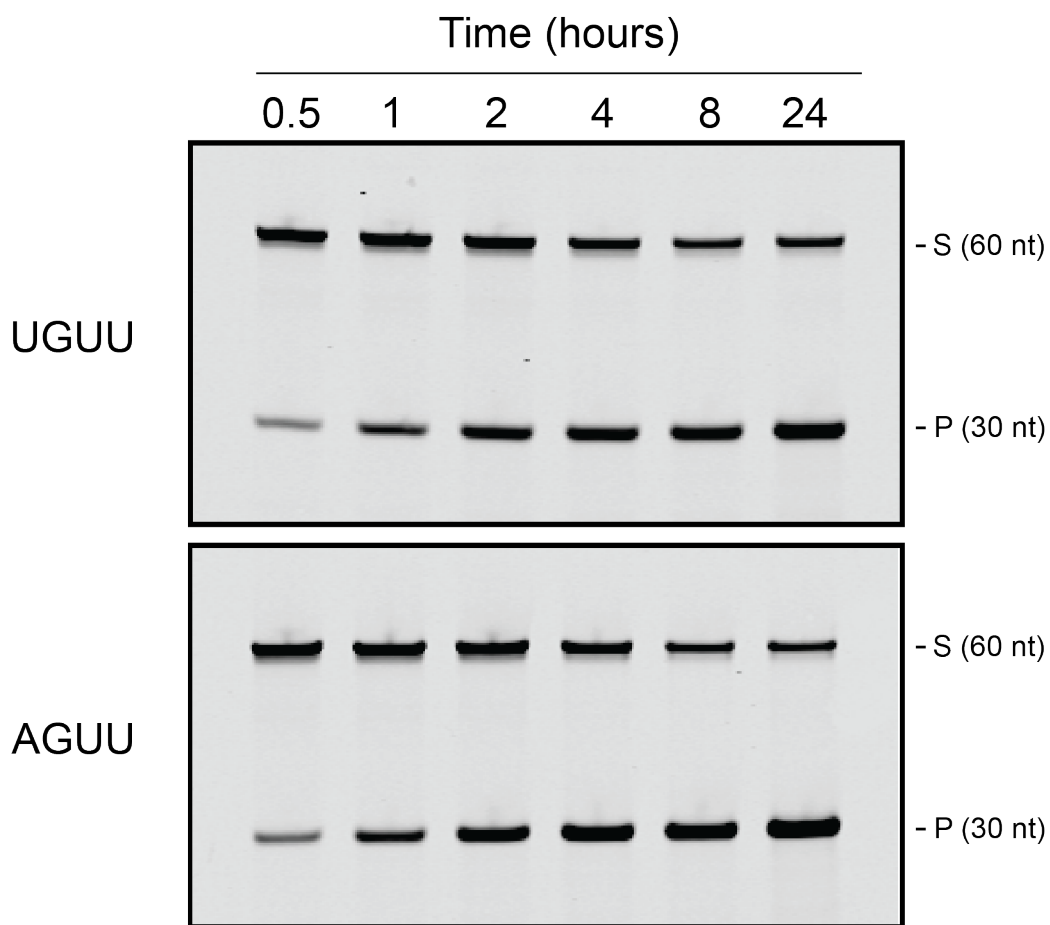

**Supplementary Figure 19. Analysis of Dz 1 cleavage preferences in long RNA substrates. a.** Representative PAGE gels showing time-dependent cleavage of the substrates shown in Supplementary Figure 18a. Reactions were performed in simulated physiological buffer containing 5 mM MgCl<sub>2</sub>, 50 mM Tris (pH 7.5), 10 mM NaCl, and 140 mM KCl at 37°C with 500 nM substrate and 50 nM enzyme (10:1, S:E). Molecular weight markers indicated to the right of the gel. S: 5'-Cy5 labeled full-length substrate, P: 5'-Cy5 labeled cleavage product. For each cleavage motif, n = 1.

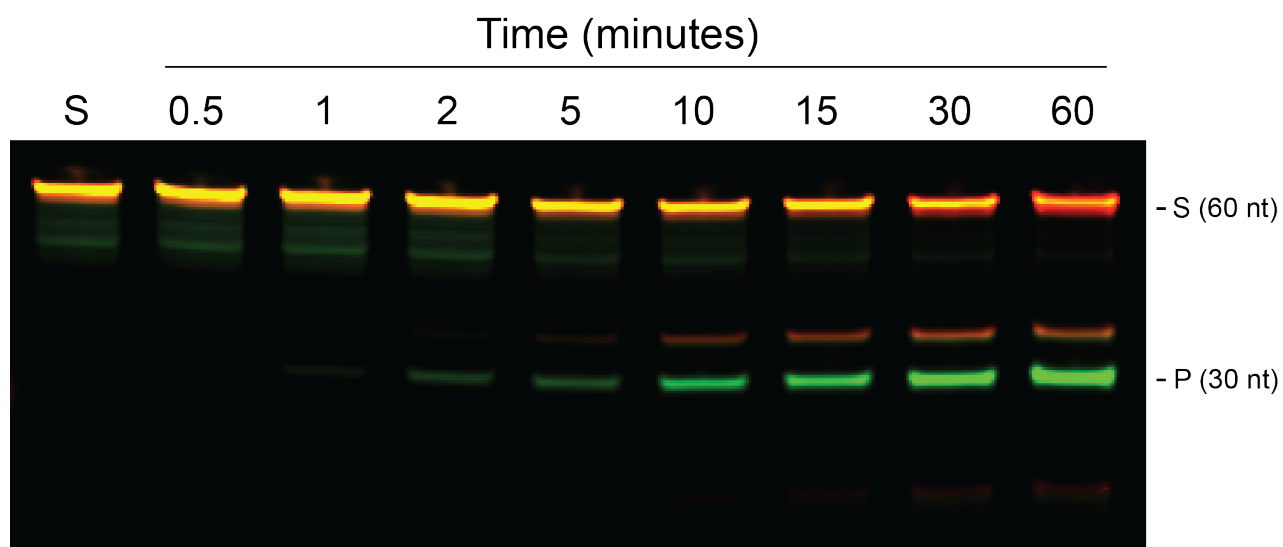

**Supplementary Figure 20. Evaluation of allele-specific cleavage by Dz 46 under multiple turnover conditions in the presence of RNase H.** Denaturing PAGE gels showing time-dependent RNA cleavage profiles in reactions containing both the wild-type (red) and G12V (green) substrates (1:1) in the presence of 5 ng/ $\mu$ L human RNase H1. Reaction was performed in a buffer containing 1 mM MgCl<sub>2</sub>, 50 mM Tris (pH 7.5), 10 mM NaCl, and 140 mM KCl at 37°C with 500 nM total substrate and 50 nM enzyme (n = 1). Molecular weight markers indicated to the right of the gel. S: 5'-Cy5 labeled full-length substrate, P: 5'-Cy5 labeled cleavage product.

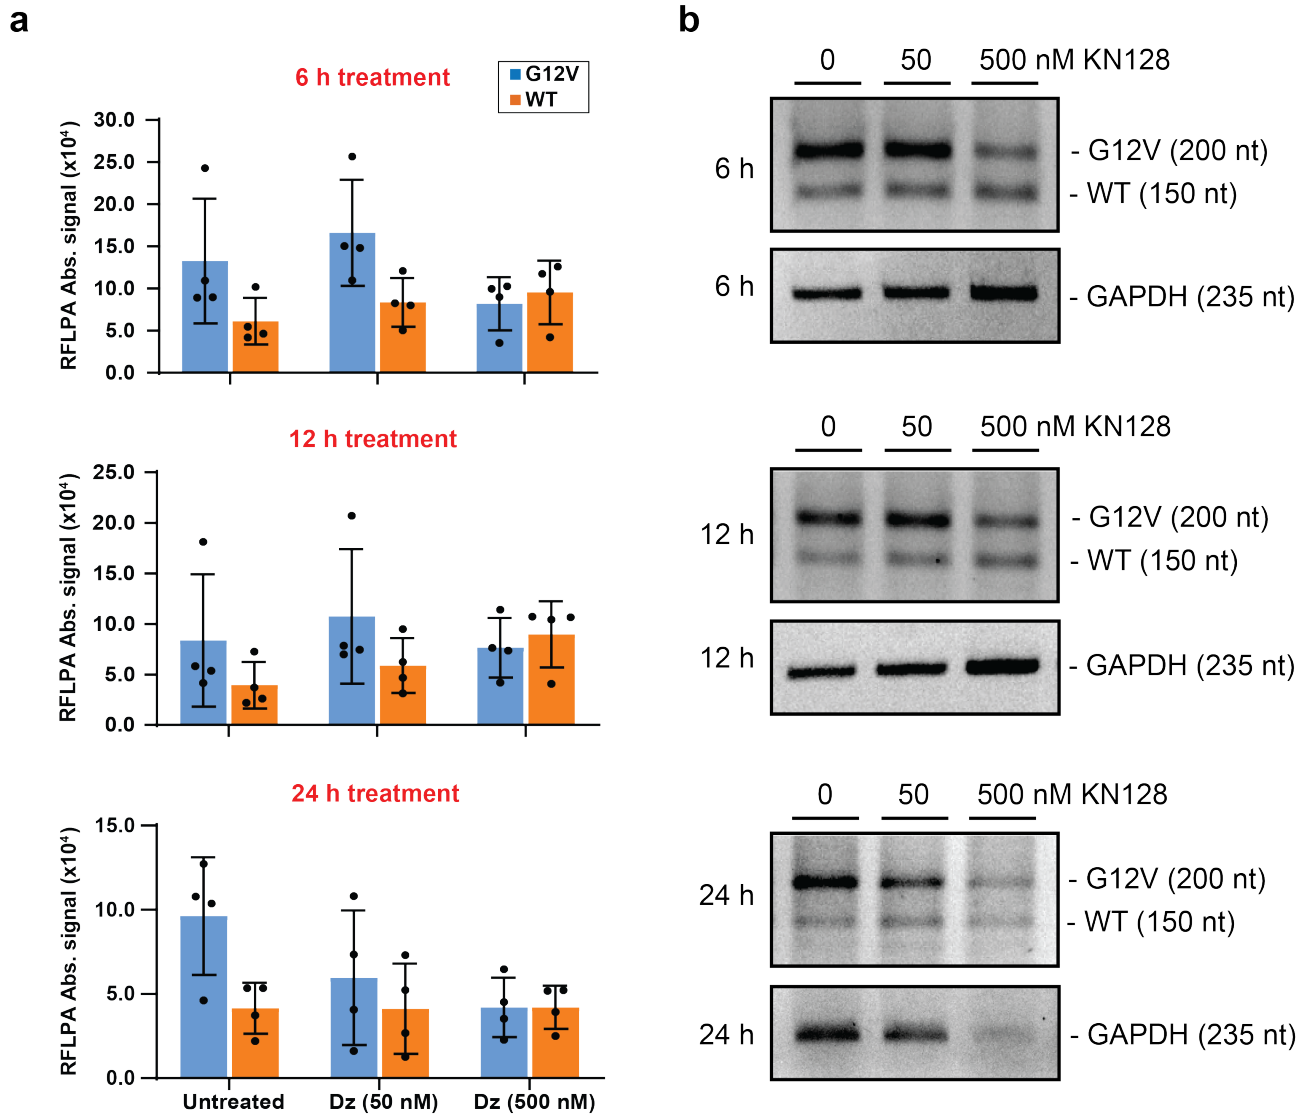

**Supplementary Figure 21. Absolute values observed for allele-specific knock-down. a.** Absolute signals of G12V and WT KRAS mRNA levels observed for cells treated with Dz 46 in a time course of 6h, 12h and 24h. Error bars denote  $\pm$  standard deviation from the mean of 4 replicates (2 biological and 2 technical). **b.** Representative of agarose gel images observed following RFLPA analysis shown in Figure 5c along with a GAPDH loading control from the same cDNA (2 technical replicates). Molecular weight markers indicated to the right of the gel.

**Table S1. G12V KRAS targeting DNAzymes used in chemical evolution screening**

| <b>DNAzyme ID</b> | <b>Sequence (5' → 3'; IDT nomenclature)</b> |
|-------------------|---------------------------------------------|
| 1                 | TACGCCAA GGCTAGCTACAACGA AGCTCCA            |
| 2                 | TACGCCAA GGCTAGCTACAAC/i2FG/A AGCTCCA       |
| 3                 | TACGCCAA GGCTAGCTACAACmGA AGCTCCA           |
| 4                 | TACGCCAA GGCTAGCTACAAC/i2MOErG/A AGCTCCA    |
| 5                 | TACGCCAA GGCTAGCTACAAC+GA AGCTCCA           |
| 6                 | TACGCCAA GGCTAGCTACAACfGA AGCTCCA           |
| 7                 | TACGCCAA GGCTAGCTACAACtGA AGCTCCA           |
| 8                 | +T+A+CGCCAAGGCTAGCUACAACGA AGCT+C+C+A       |
| 9                 | +T+A+CGCCAA*GGCTAGCTACAACGA AGCT+C+C+A      |
| 10                | +T+A+CGCCAA*GGCTAGCTACAACmGA AGCT+C+C+A     |
| 11                | +TmAmCmGCCAA GGCTAGCTACAACGA AGCmUmCmC+A    |
| 12                | +TmAmCmGCCAA*GGCTAGCTACAACGA AGCmUmCmC+A    |
| 13                | +TmAmCmGCCAA*GGCTAGCTACAACmGA AGCmUmCmC+A   |
| 14                | +T+A+CGCCAA*mGGCTAGCTACAACmGA AGCT+C+C+A    |
| 15                | +T+A+CGCCAA*GmGCTAGCTACAACmGA AGCT+C+C+A    |
| 16                | +T+A+CGCCAA*GGmCTAGCTACAACmGA AGCT+C+C+A    |
| 17                | +T+A+CGCCAA*GGCmUAGCTACAACmGA AGCT+C+C+A    |
| 18                | +T+A+CGCCAA*GGCTmAGCTACAACmGA AGCT+C+C+A    |
| 19                | +T+A+CGCCAA*GGCTAmGCTACAACmGA AGCT+C+C+A    |
| 20                | +T+A+CGCCAA*GGCTAGmCTACAACmGA AGCT+C+C+A    |
| 21                | +T+A+CGCCAA*GGCTAGCmUACAACmGA AGCT+C+C+A    |
| 22                | +T+A+CGCCAA*GGCTAGCTmACAACmGA AGCT+C+C+A    |
| 23                | +T+A+CGCCAA*GGCTAGCTAmCAACmGA AGCT+C+C+A    |
| 24                | +T+A+CGCCAA*GGCTAGCTACmAACmGA AGCT+C+C+A    |
| 25                | +T+A+CGCCAA*GGCTAGCTACAmACmGA AGCT+C+C+A    |
| 26                | +T+A+CGCCAA*GGCTAGCTACAAmCmGA AGCT+C+C+A    |
| 27                | +T+A+CGCCAA*GGCTAGCTACAACmGmA AGCT+C+C+A    |



| DNAzyme ID | Sequence (5' → 3'; IDT nomenclature)                                  |
|------------|-----------------------------------------------------------------------|
| 28         | TACGCCAA GGCTAGmCTACAACGA AGCTCCA                                     |
| 29         | TACGCCAA GGCTAGCmUACAACGA AGCTCCA                                     |
| 30         | TACGCCAA GGCTAGmCmUACAACGA AGCTCCA                                    |
| 31         | TACGCCAA GGCTAGmCmUACAACmGA AGCTCCA                                   |
| 32         | TACGCCAA GGCTAG/i2MOErC/TACAACGA AGCTCCA                              |
| 33         | TACGCCAA GGCTAGC/i2MOErT/ACAACGA AGCTCCA                              |
| 34         | TACGCCAA GGCTAG/i2MOErC//i2MOErT/ACAAC/i2MOErG/A<br>AGCUCCA           |
| 35         | TACGCCAA*GGCTAGmCmUACAACmGA AGCTCCA                                   |
| 36         | TACGCCAA GGCTAGmCmUACAAC/i2MOErG/A AGCTCCA                            |
| 37         | TACGCCAA*GGCTAGmCmUACAAC/i2MOErG/A AGCTCCA                            |
| 38         | +TmAmCmGCCAA*GGCTAGmCmUACAACmGA AGCmUmCmC+A                           |
| 39         | +TmAmCmGCCAA*GGCTAG+CTACAACmGA AGCmUmCmC+A                            |
| 40         | +TmAmCmGCCAA*GGCTAGC+TACAACmGA AGCmUmCmC+A                            |
| 41         | +TmAmCmGCCAA*GGCTAGC*TACAACmGA AGCmUmCmC+A                            |
| 42         | +TmAmCmGCCAA*GGCTAGmCmUACAAC/i2MOErG/A<br>AGCmUmCmC+A                 |
| 43         | +TmAmCmGCCAA*GGCTAG/i2MOErC//i2MOErT/ACAAC/i2MOErG/<br>A AGCmUmCmC+A  |
| 44         | +TmAmCmGCCAA*GGCTAGmCmUACAAC*mGA AGCmUmCmC+A                          |
| 45         | +TmAmCmGCCAA*GGCTAG/i2MOErC//i2MOErT/ACAAC*/i2MOErG<br>/A AGCmUmCmC+A |
| 46         | +TmAmCmGCCAA*GGCTAGmCmUACAAC*/i2MOErG/A<br>AGCmUmCmC+A                |

Note: LNA (+); 2'-O-methoxyribonucleic acid (m); phosphorothioate linkage (\*); 2'-O-methoxyethylribonucleic acid (/i2MOE/); FANA (f); TNA (t); 2'-fluororibonucleic acid (/i2F/)

**Table S2. Control oligos (active, inactive, and non-binding DNazymes, ASO)**

| <b>DNAzyme ID</b> | <b>Sequence (5' → 3'; IDT nomenclature)</b>             | <b>DNAzyme description</b>                                                   |
|-------------------|---------------------------------------------------------|------------------------------------------------------------------------------|
| 47                | +TmAmCmGCCAA*GGCCATmCmUAC<br>AAC*/i2MOErG/A AGCmUmCmC+A | Dz 46 with <b>T4C</b> and <b>G6T</b> mutations in the core → <b>INACTIVE</b> |
| 48                | GCCTACGCCAACAGCTCCAAC                                   | ASO: 22 nt DNA complementary to KRAS G12V RNA                                |
| 49                | +CmUmAmCGCCA*GGCTAGmCmUA<br>CAAC*/i2MOErG/A CAGmCmUmC+C | WT KRAS-targeting DNAzyme                                                    |
| 50                | +AmGmGmUGACA*GGCTAGmCmUA<br>CAAC*/i2MOErG/A TATmAmGmA+A | GFP-targeting DNAzyme (non-binding Dz)                                       |
| DV15E4-KRAS       | mUmAmCmGCCAA<br>GmGCTAGmCmUACmAACmGmA<br>AGCmUmCmCmA    | Known motif for benchmarking                                                 |
| DH5E-KRAS         | mUmAmCmGmCCAA<br>GmGCTAGmCmUACmAACmGmA<br>AGmCmUmCmCmA  | Known motif for benchmarking                                                 |

Note: LNA (+); 2'-O-methoxyribonucleic acid (m); phosphorothioate linkage (\*); 2'-O-methoxyethylribonucleic acid (/i2MOE/)

**Table S3. DNAzymes used to define the preferred cleavage motif**

| <b>DNAzyme</b>                               | <b>Sequence (5' → 3'; IDT nomenclature)</b>             |
|----------------------------------------------|---------------------------------------------------------|
| DNAzyme 46 variant targeting UGUC RNA motif  | +TmAmCmGCCGA*GGCTAGmCmUACAAC*/i2<br>MOErG/A AGCmUmCmC+A |
| DNAzyme 46 variant targeting UGUA RNA motif  | +TmAmCmGCCTA*GGCTAGmCmUACAAC*/i2<br>MOErG/A AGCmUmCmC+A |
| DNAzyme 46 variant targeting UGUG RNA motif  | +TmAmCmGCCCA*GGCTAGmCmUACAAC*/i2<br>MOErG/A AGCmUmCmC+A |
| DNAzyme 46 variant targeting CGUU RNA motif  | +TmAmCmGCCAA*GGCTAGmCmUACAAC*/i2<br>MOErG/A GGCmUmCmC+A |
| DNAzyme 46 variant targeting AGUU RNA motif  | +TmAmCmGCCAA*GGCTAGmCmUACAAC*/i2<br>MOErG/A TGCmUmCmC+A |
| DNAzyme 46 variant targeting GGUU RNA motif  | +TmAmCmGCCAA*GGCTAGmCmUACAAC*/i2<br>MOErG/A CGCmUmCmC+A |
| GATA3-targeting Dz 46 (based on Ref 26)      | +TmGmGmATGGA*GGCTAGmCmUACAAC*/i2<br>MOErG/A GTCmUmUmG+G |
| GATA3 Dz 46 variant targeting UGUU RNA motif | +TmGmGmATGAA*GGCTAGmCmUACAAC*/i2<br>MOErG/A ATCmUmUmG+G |
| c-jun-targeting Dz 46 (based on Ref 27)      | +GmGmGmAGGAA*GGCTAGmCmUACAAC*/i<br>2MOErG/A GAGmGmCmG+T |
| c-jun Dz 46 variant targeting UGUU RNA motif | +GmGmGmAGGAA*GGCTAGmCmUACAAC*/i<br>2MOErG/A AAGmGmCmG+T |
| HTT-targeting Dz 46                          | +TmGmCmUGCAA*GGCTAGmCmUACAAC*/i2<br>MOErG/A AGCmUmCmC+A |
| HTT Dz 46 variant targeting CGUU RNA motif   | +TmGmCmUGCAA*GGCTAGmCmUACAAC*/i2<br>MOErG/A GGCmUmCmC+A |
| PCSK9-targeting Dz 46                        | +GmCmAmCGGAA*GGCTAGmCmUACAAC*/i2<br>MOErG/A AAGmAmGmC+T |
| PCSK9 Dz 46 variant targeting AGUU RNA motif | +GmCmAmCGGAA*GGCTAGmCmUACAAC*/i2<br>MOErG/A TAGmAmGmC+T |
| PCSK9 Dz 1 variant targeting UGUU motif      | GCACGGAA GGCTAGCTACAACGA<br>AAGAGCT                     |
| HTT Dz 1 variant targeting UGUU motif        | TGCTGCAA GGCTAGCTACAACGA AGCTCCA                        |
| GATA3 Dz 1 variant targeting UGUU motif      | TGGATGAA GGCTAGCTACAACGA ATCTTGG                        |

| <b>DNAzyme</b>                          | <b>Sequence (5' → 3'; IDT nomenclature)</b> |
|-----------------------------------------|---------------------------------------------|
| c-jun Dz 1 variant targeting UGUU motif | GGGAGGAA GGCTAGCTACAACGA<br>AAGGCGT         |

Note: LNA (+); 2'-O-methoxyribonucleic acid (m); phosphorothioate linkage (\*); 2'-O-methoxyethylribonucleic acid (/i2MOE/)

**Table S4. RNA substrates**

| <b>RNA Substrates</b>                                                                                                             | <b>Sequence (5'→3'; IDT nomenclature)</b>                                                                                                    |
|-----------------------------------------------------------------------------------------------------------------------------------|----------------------------------------------------------------------------------------------------------------------------------------------|
| 16 nt –G12V KRAS<br>(NCBI: NM_004985, human GTPase KRAS mRNA variant b, (positions 217-232: G225U mutation, codon 12 GGU to GUU)) | /5Cy5/rUrGrGrArGrCr <u>UrGrUr</u> UrGrGrCrGrUrA                                                                                              |
| 60 nt –G12V KRAS<br>(NCBI: NM_004985, human GTPase KRAS mRNA variant b, (positions 195-254: G225U mutation, codon 12 GGU to GUU)) | /5Cy5/ rCrUrGrArArUrArUrArArArCrUrUrGrUrGrGrUrArGrUrUrGrGrArGrCr <u>UrGrUr</u> UrGrGrCrGrUrArGrGrCrArArGrArGrUrGrCrCrUrUrGrArCrG rArUrArC    |
| 16 nt –WT KRAS<br>(NCBI: NM_004985, human GTPase KRAS mRNA variant b, (positions 218-233))                                        | /5Cy5/rGrGrArGrCrUrGr <u>GrUr</u> GrGrCrGrUrArG                                                                                              |
| 60 nt –WT KRAS<br>(NCBI: NM_004985, human GTPase KRAS mRNA variant b, (positions 195-254))                                        | /5Cy5/ rCrUrGrArArUrArUrArArArCrUrUrGrUrGrGrUrArGrUrUrGrGrArGrCrUrGr <u>GrUr</u> GrGrCrGrUrArGrGrCrArArGrArGrUrGrCrCrUrUrGrArCrG rArUrArC    |
| 60 nt- G12V KRAS (5'Alexa Fluor 750)                                                                                              | /5Alex750N/rCrUrGrArArUrArUrArArArCrUrUrGrUrGrGrUrArGrUrUrGrGrArGrCrUr <u>GrUr</u> UrGrGrCrGrUrArGrGrCrArArGrArGrUrGrCrCrUrUrGrArCrGrArUrArC |
| 16 nt - G12V KRAS substrate variant with UGUC motif                                                                               | /5Cy5/rUrGrGrArGrCr <u>UrGrUr</u> CrGrGrCrGrUrA                                                                                              |
| 16 nt - G12V KRAS substrate variant with UGUA motif                                                                               | /5Cy5/rUrGrGrArGrCr <u>UrGrUr</u> ArGrGrCrGrUrA                                                                                              |
| 16 nt - G12V KRAS substrate variant with UGUG motif                                                                               | /5Cy5/rUrGrGrArGrCr <u>UrGrUr</u> GrGrGrCrGrUrA                                                                                              |
| 16 nt - G12V KRAS substrate variant with CGUU motif                                                                               | /5Cy5/rUrGrGrArGrCr <u>CrGrUr</u> UrGrGrCrGrUrA                                                                                              |
| 16 nt - G12V KRAS substrate variant with AGUU motif                                                                               | 5Cy5/rUrGrGrArGrCr <u>ArGrUr</u> UrGrGrCrGrUrA                                                                                               |
| 16 nt - G12V KRAS substrate variant with GGUU motif                                                                               | /5Cy5/rUrGrGrArGrCr <u>GrGrUr</u> UrGrGrCrGrUrA                                                                                              |
| 60 nt - G12V KRAS substrate variant with AGUU motif                                                                               | /5Cy5/rCrUrGrArArUrArUrArArArCrUrUrGrUrGrGrUrArGrUrUrGrGrArGrCr <u>ArGrUr</u> UrGrGrCrGrUrArGrGrCrArArGrArGrUrGrCrCrUrUrGrArCrGrArUrArC      |
| 16 nt - GATA3<br>NCBI: NM_001002295.2 (positions 926-941)                                                                         | /5Cy5/rCrCrArArGrAr <u>CrGrUr</u> CrCrArUrCrCrA                                                                                              |

| <b>RNA Substrates</b>                                     | <b>Sequence (5'-&gt;3'; IDT nomenclature)</b>   |
|-----------------------------------------------------------|-------------------------------------------------|
| 16 nt - GATA3 substrate variant with UGUU motif           | /5Cy5/rCrCrArArGrAr <u>UrGrUr</u> CrArUrCrCrA   |
| 16 nt - c-jun<br>NCBI: NM_002228.4 (positions 1021-1036)  | /5Cy5/rArCrGrCrCrUr <u>CrGrUr</u> CrCrUrCrCrC   |
| 16 nt - c-jun substrate variant with UGUU motif           | /5Cy5/rArCrGrCrCrUr <u>UrGrUr</u> CrCrUrCrCrC   |
| 16 nt - HTT<br>NCBI: NM_001388492.1 (positions 1275-1290) | /5Cy5/rUrGrGrArGrCr <u>UrGrUr</u> UrGrCrArGrCrA |
| 16 nt - HTT substrate variant with CGUU motif             | /5Cy5/rUrGrGrArGrCr <u>CrGrUr</u> UrGrCrArGrCrA |
| 16 nt - PCSK9<br>NCBI: NM_174936.4 (positions 2703-2718)  | /5Cy5/rArGrCrUrCrUr <u>UrGrUr</u> CrCrGrUrGrC   |
| 16 nt - PCSK9 substrate variant with AGUU motif           | /5Cy5/rArGrCrUrCrUr <u>ArGrUr</u> CrCrGrUrGrC   |

Note: r denotes RNA; /5Cy5/: Cy5 tag at 5' end; /5Alex750N/: Alexa Fluor 750 tag at 5' end; GU cleavage sites are bolded; 4 nt. cleavage motifs are underlined.

**Table S5. HsRNase H1 level in human cell lines measured by ELISA**

|                                        | <b>HEK cells</b>  | <b>K562 cells</b>  |
|----------------------------------------|-------------------|--------------------|
| Diameter ( $\mu\text{m}$ )             | $13.9 \pm 0.13^a$ | $20.94 \pm 1.08^b$ |
| Cell volume ( $\mu\text{m}^3$ )        | 1405.47           | 4805.17            |
| Cell volume (pL)                       | 1.40547           | 4.80517            |
| Amt HsRNase H1 / cell by ELISA (fg)    | 2.98              | 1.07               |
| [RNase H1] / cell (fg/pL)              | 2.12              | 0.22               |
| [RNase H1] / cell (ng/ $\mu\text{L}$ ) | 2.12              | 0.22               |
| HsRNase H1 MW (Kg/mol)                 | 37.60             | 37.60              |
| [HsRNaseH1] (nM)                       | 56.37             | 5.93               |

<sup>a</sup> Mateus, A, et al., (2013) Mol. Pharmaceutics, 10:2467-2478; BNID:108893

<sup>b</sup> Jiang, Xiaoyu et al., (2016) Magnetic Resonance in Medicine, 75:2076-1085
